# Supplementary material for: Insight into Source and Evolution of Oxalic Acid: Characterization of Particulate Organic Diacids in a Mega-City, Shanghai from 2008 to 2020
Source: MDPI journal article supplement (doi:10.3390/atmos13091347), 2022-08-24
Supplement: s1 [file s1]

# Supplementary Materials: Insight into the Source and Evolution of Oxalic Acid: Characterization of Particulate Organic Diacids in a Mega-City, Shanghai from 2008 to 2020

Ning Zhang <sup>1</sup>, Fan Fan <sup>1</sup>, Yi Feng <sup>1</sup>, Ming Hu <sup>2</sup>, Qingyan Fu <sup>2</sup>, Jing Chen <sup>3</sup>, Shunyao Wang <sup>1,\*</sup> and Jialiang Feng <sup>1,\*</sup>

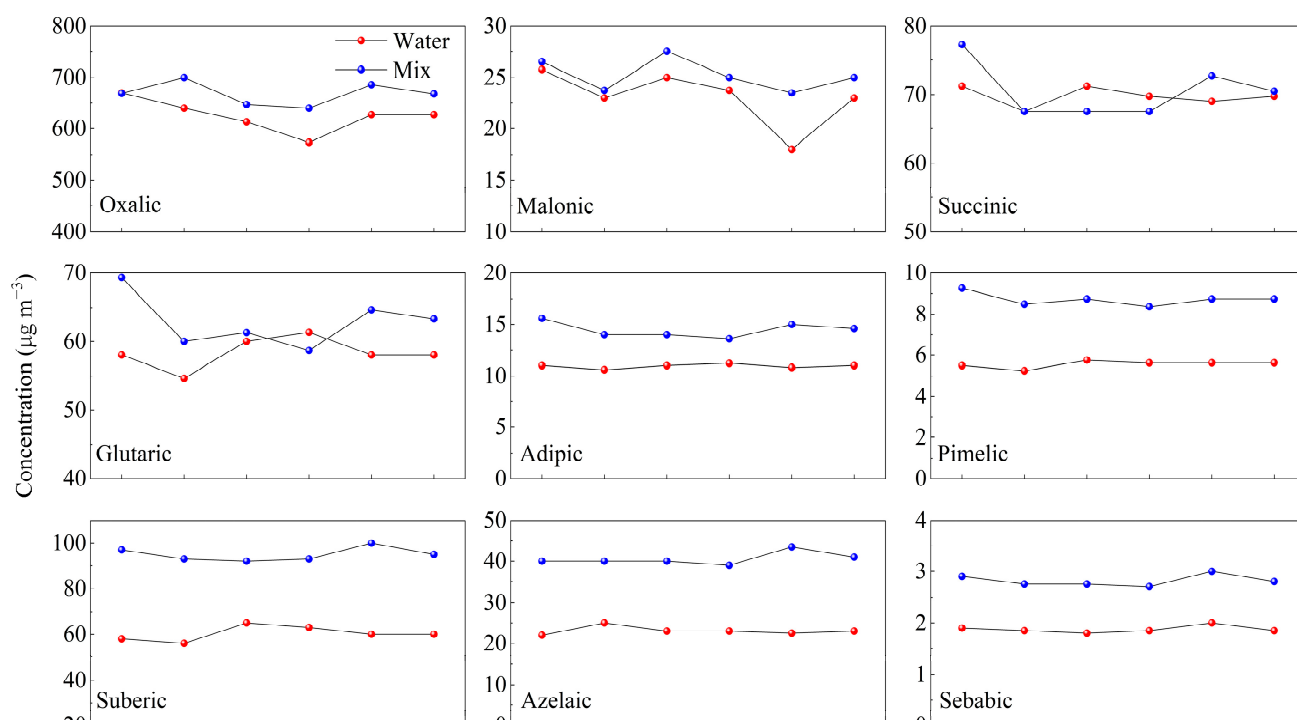

**Figure S1.** Comparison of the measured concentrations of different diacids in  $\text{PM}_{2.5}$  extracted with Water (100% water) and Mix (50% methanol/water solution (v/v)).

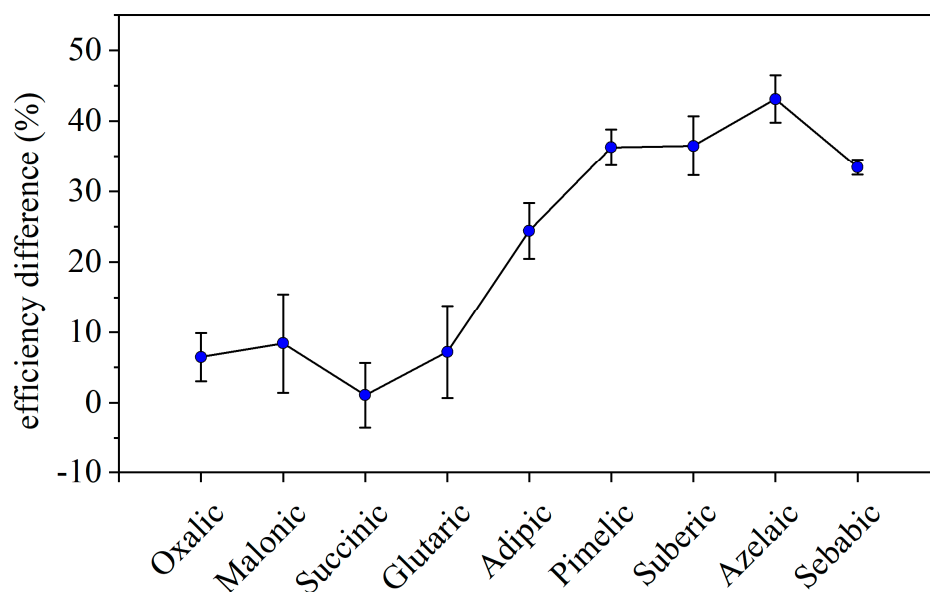

**Figure S2.** Differences in concentrations of particulate diacids measured by extraction with 50% methanol/water solution (v/v) compared to 100% water.

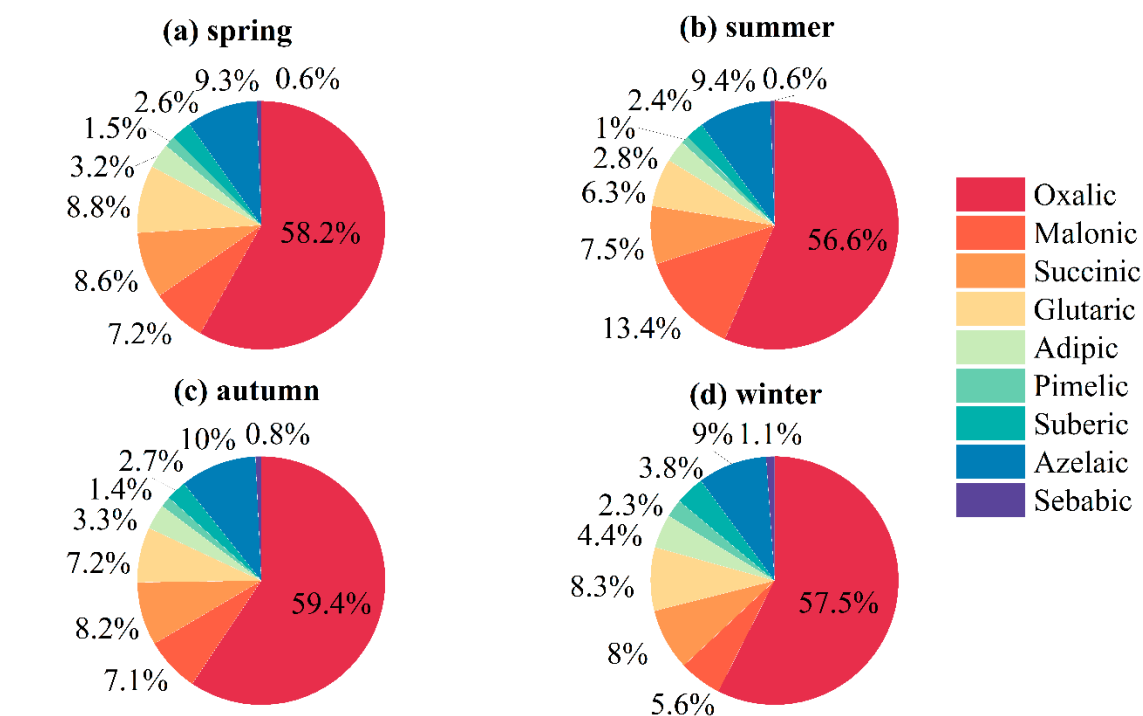

**Figure S3.** Seasonal variation of the diacid content in PM<sub>2.5</sub> at the BS site.

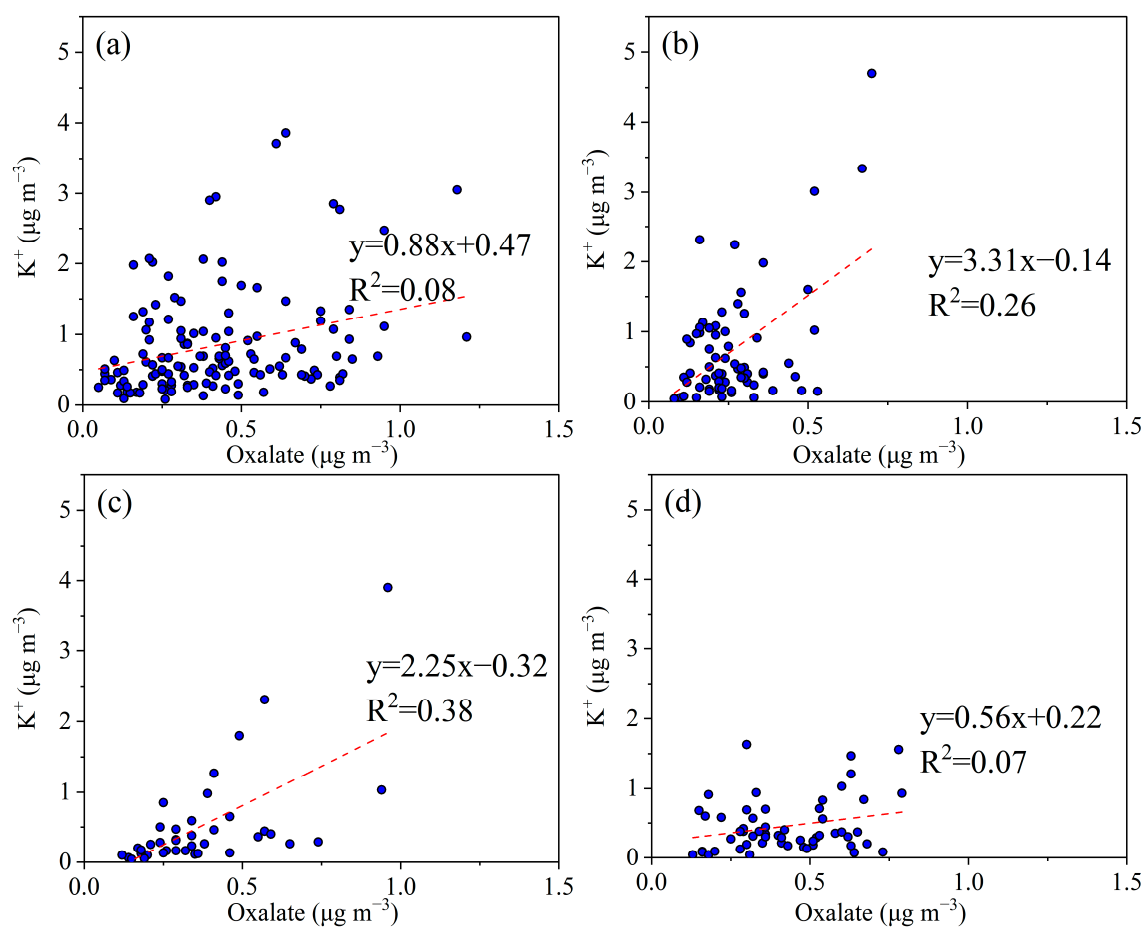

**Figure S4.** Correlation between oxalate and  $K^+$  in (a):2008; (b):2010; (c):2013; (d):2014 at the BS site.

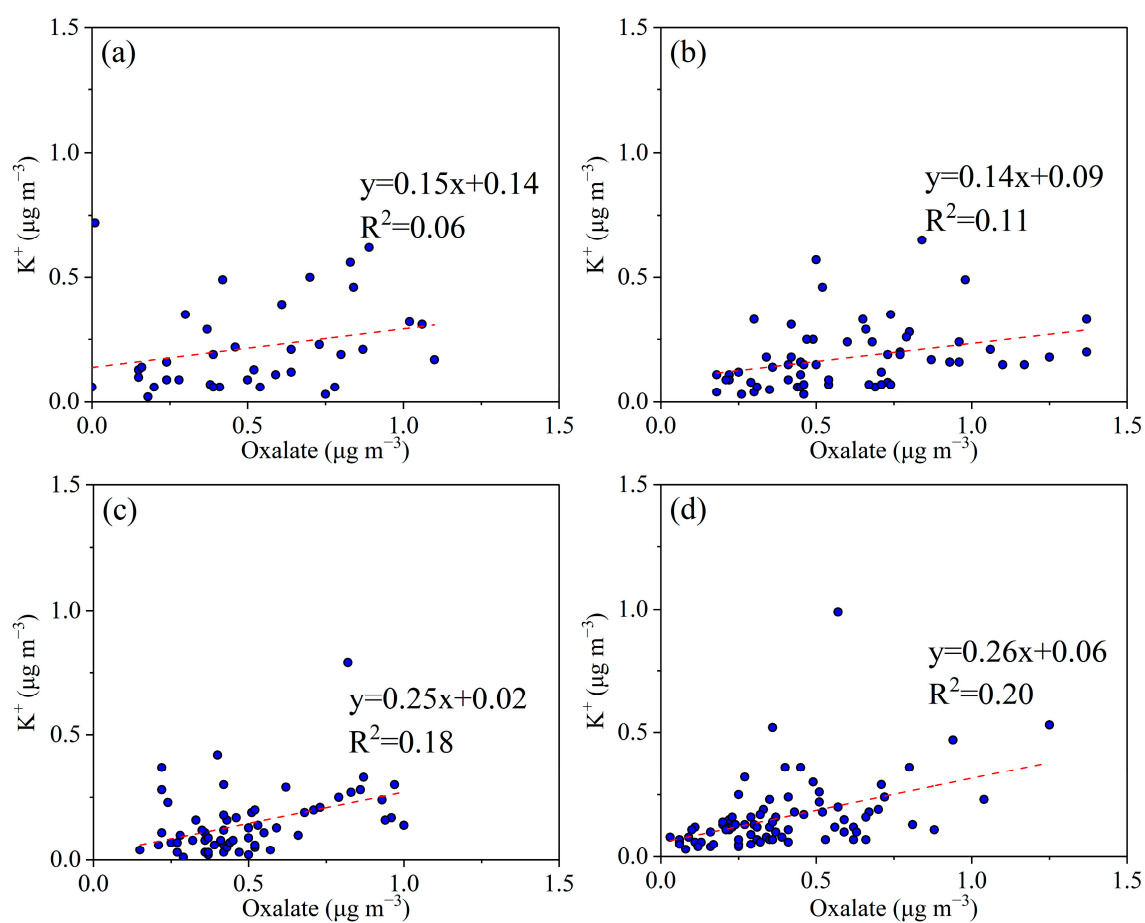

**Figure S5.** Correlation between oxalate and  $K^+$  in (a):2016; (b):2017; (c):2018; (d):2019 at the PD site.

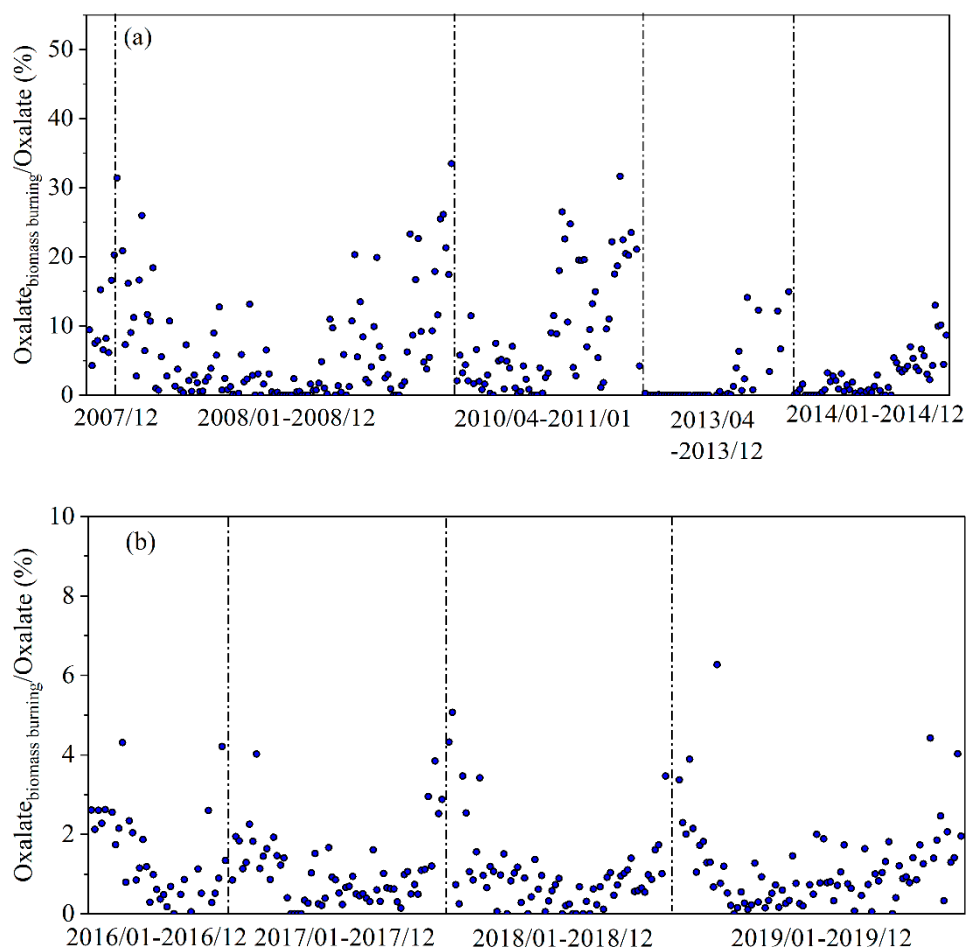

**Figure S6.** Time series of BB contribution to oxalate in BS (a) and PD (b).



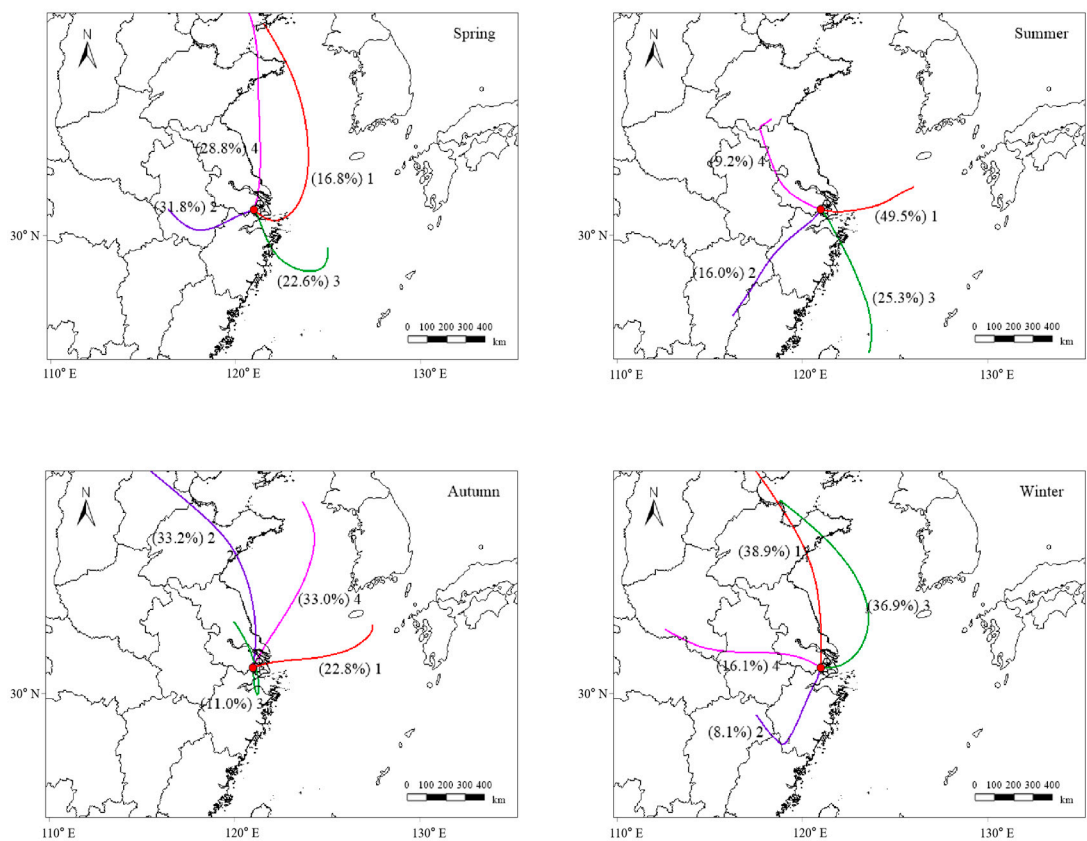

**Figure S7.** Clusters of backward trajectories for air parcels arriving in Shanghai during 2019.

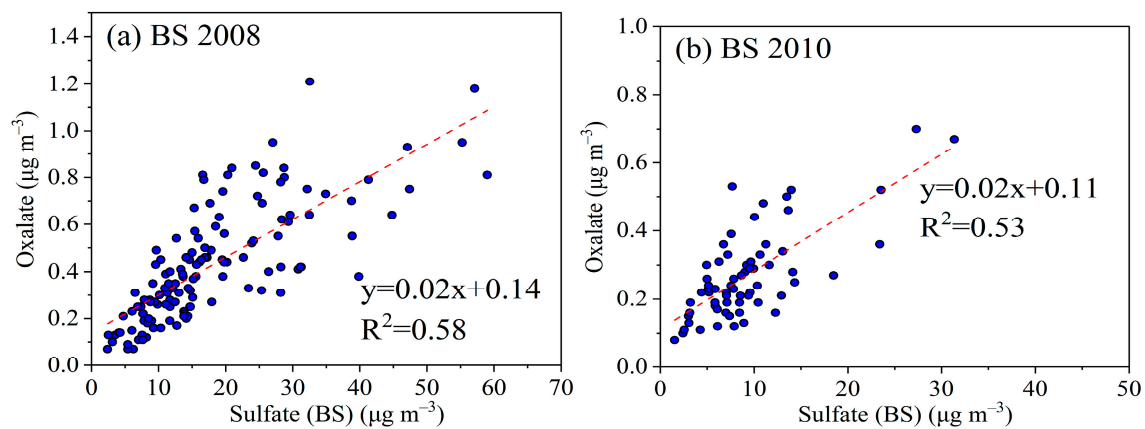

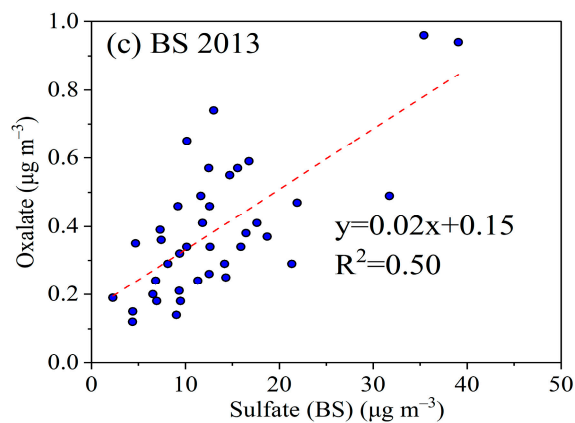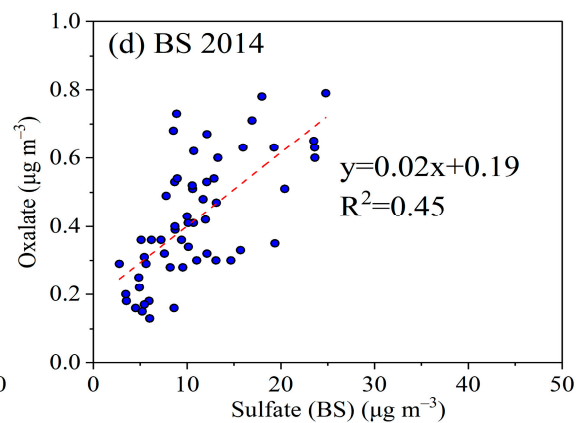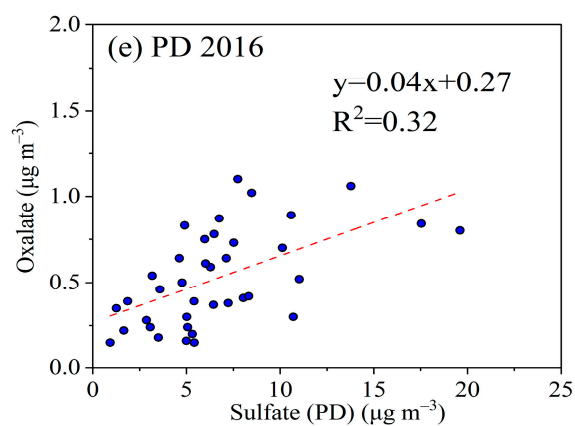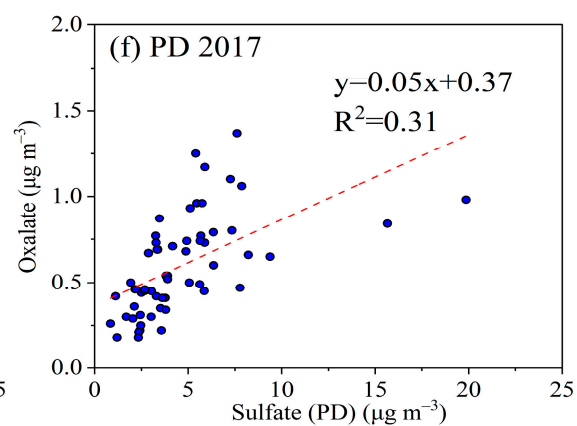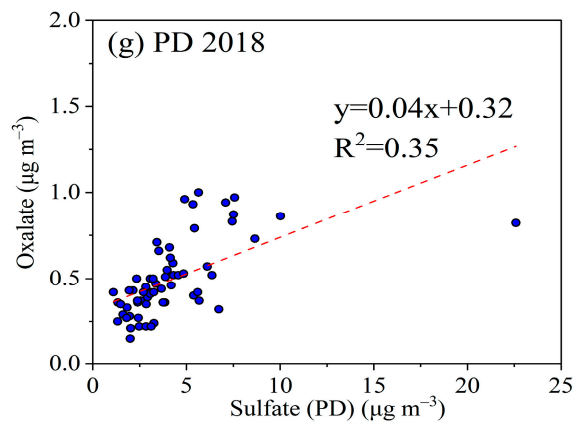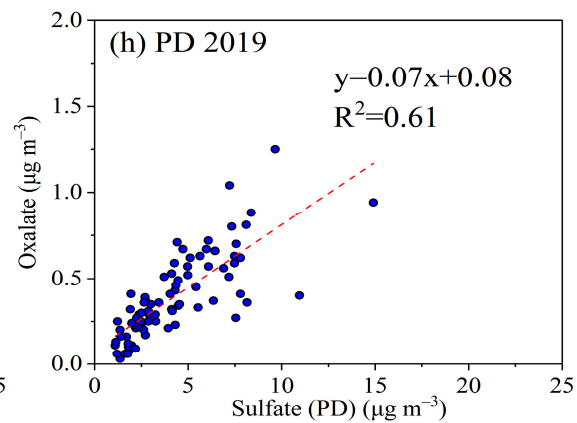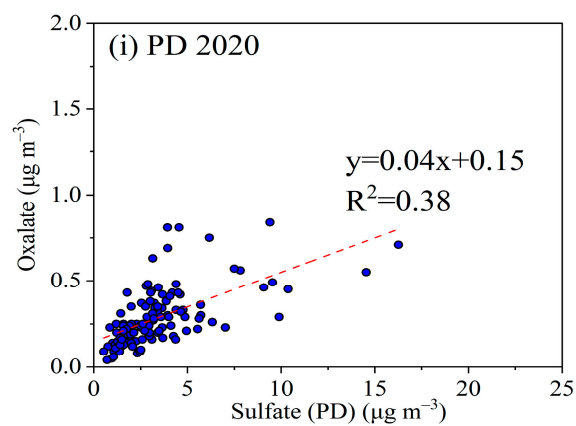

**Figure S8.** Oxalate correlation with sulfate: (a-i:BS2008-PD2020).

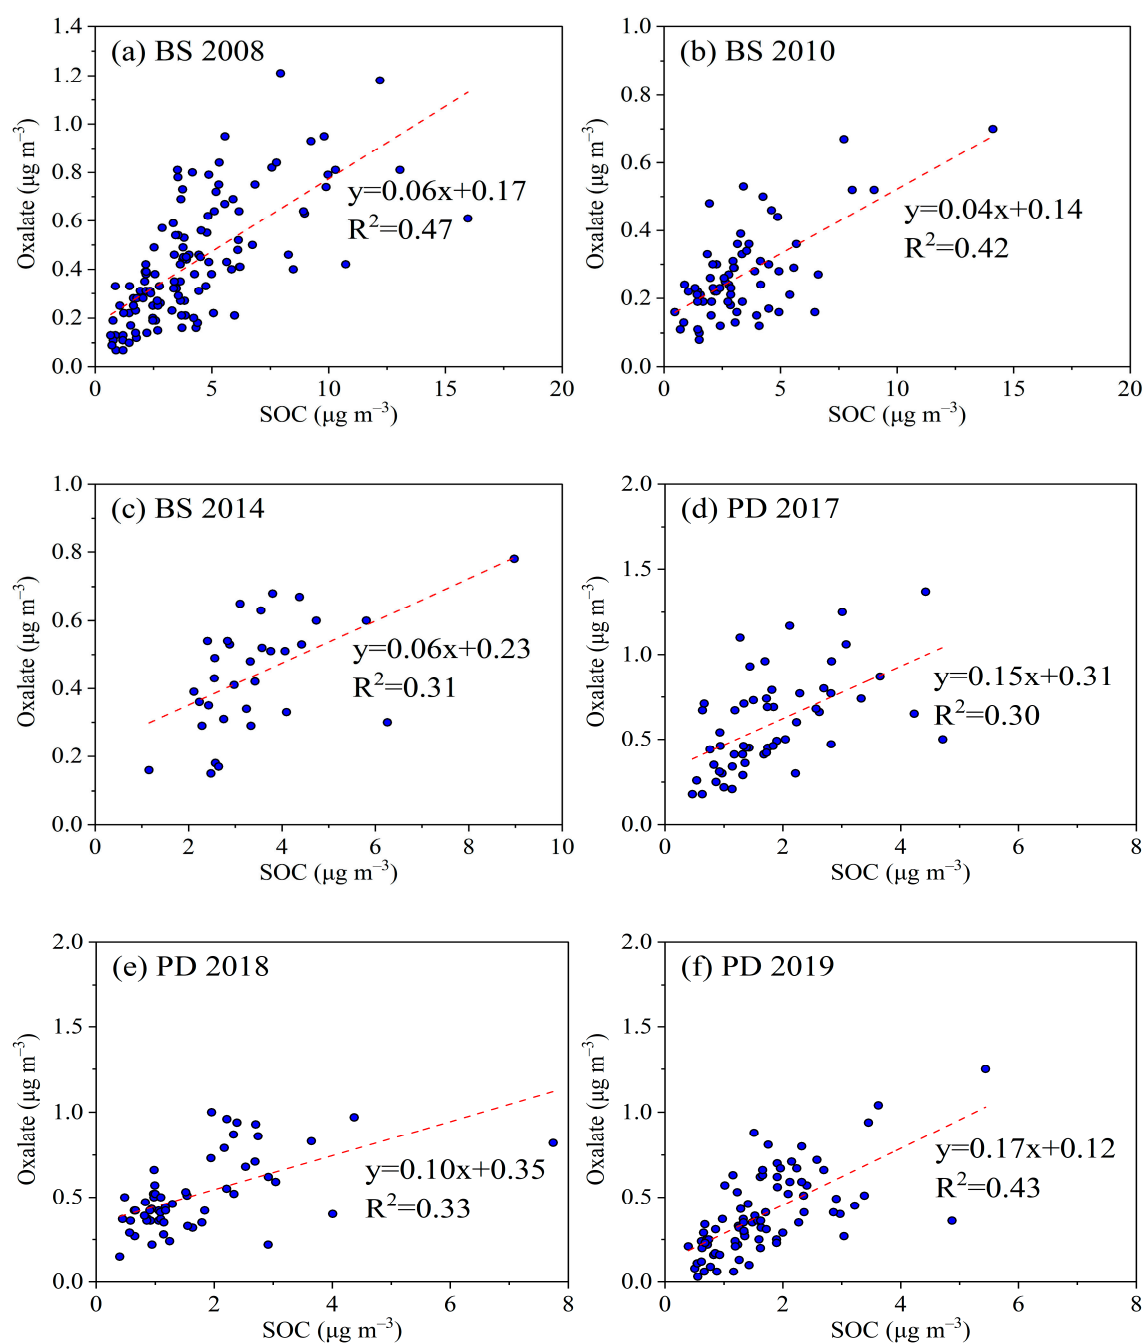

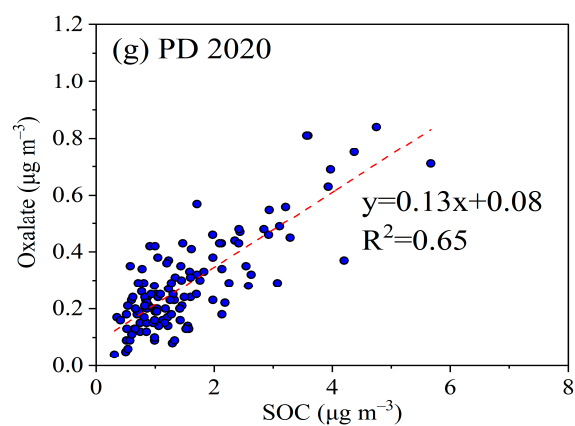

Figure S9. Oxalate correlation with SOC (a-g:BS2008-PD2020).

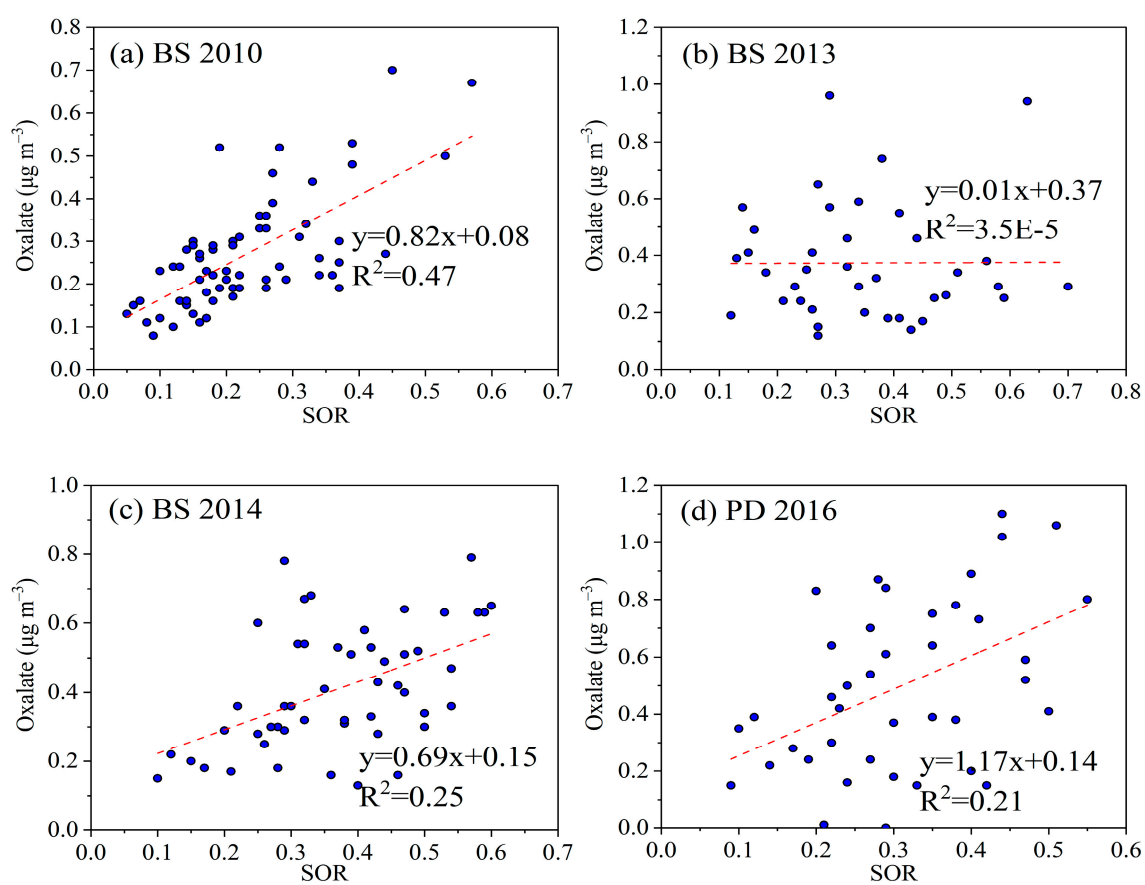

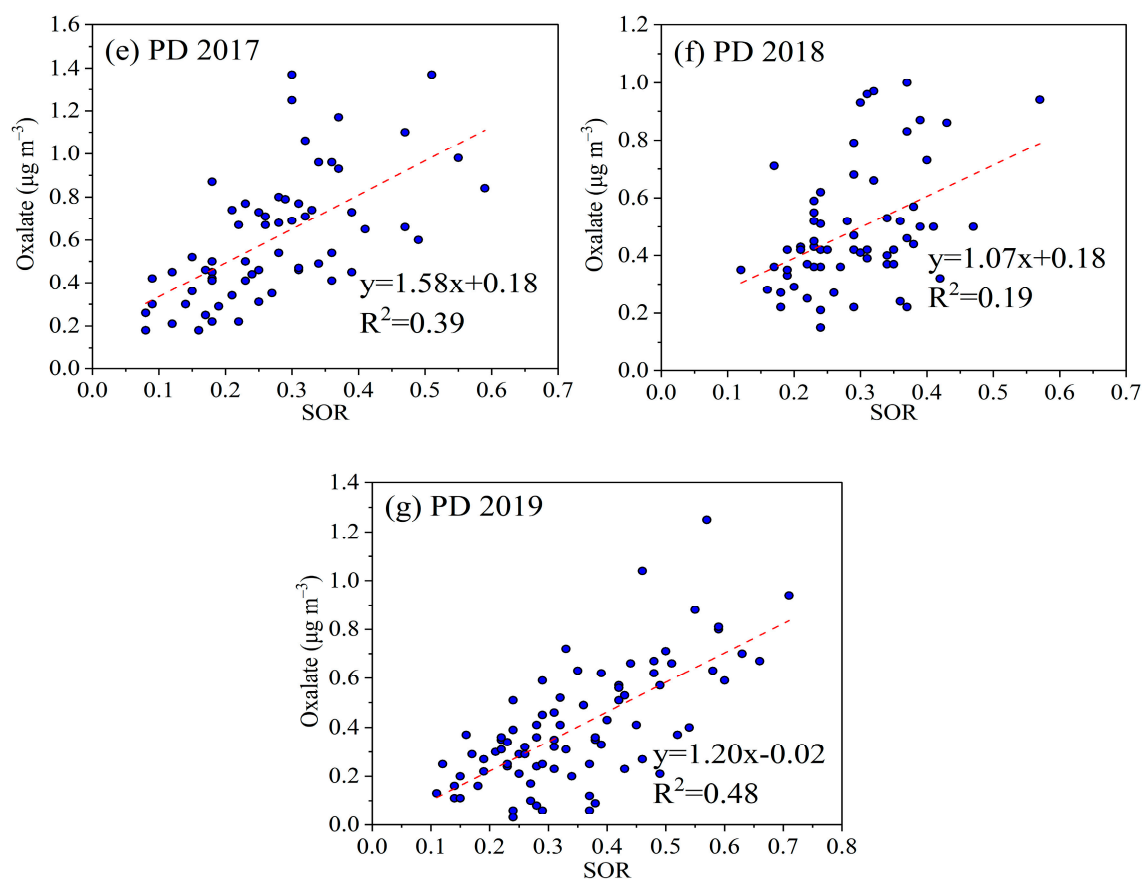

**Figure S10.** Oxalate correlation with SOR (a-g:BS2010-PD2019).

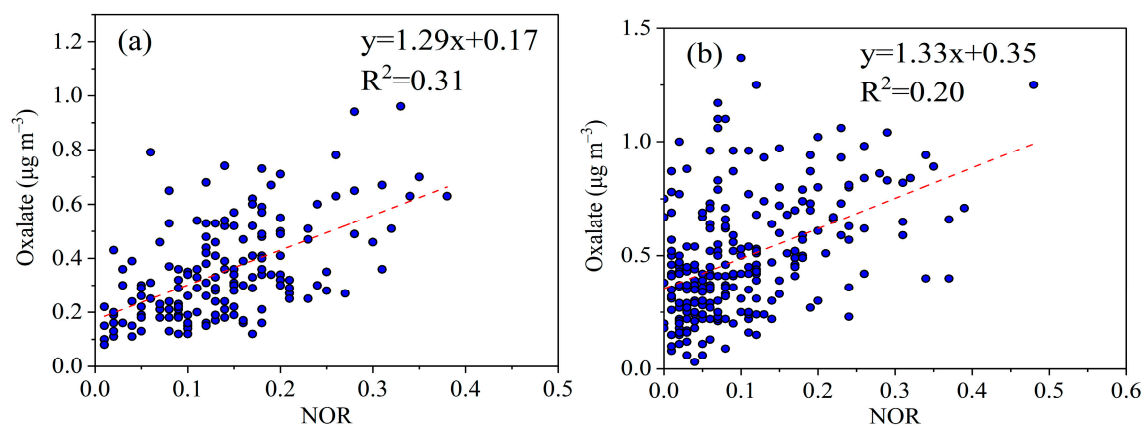

**Figure S11.** Oxalate correlation with NOR for BS (a) and PD(b).

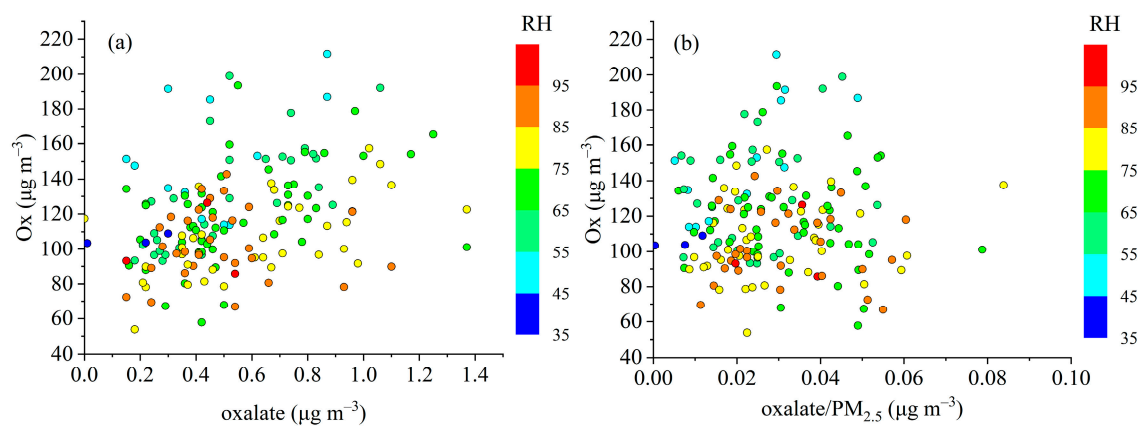

**Figure S12.** (a) RH distribution of oxalate and Ox; (b) RH distribution of oxalate/PM<sub>2.5</sub> and Ox.

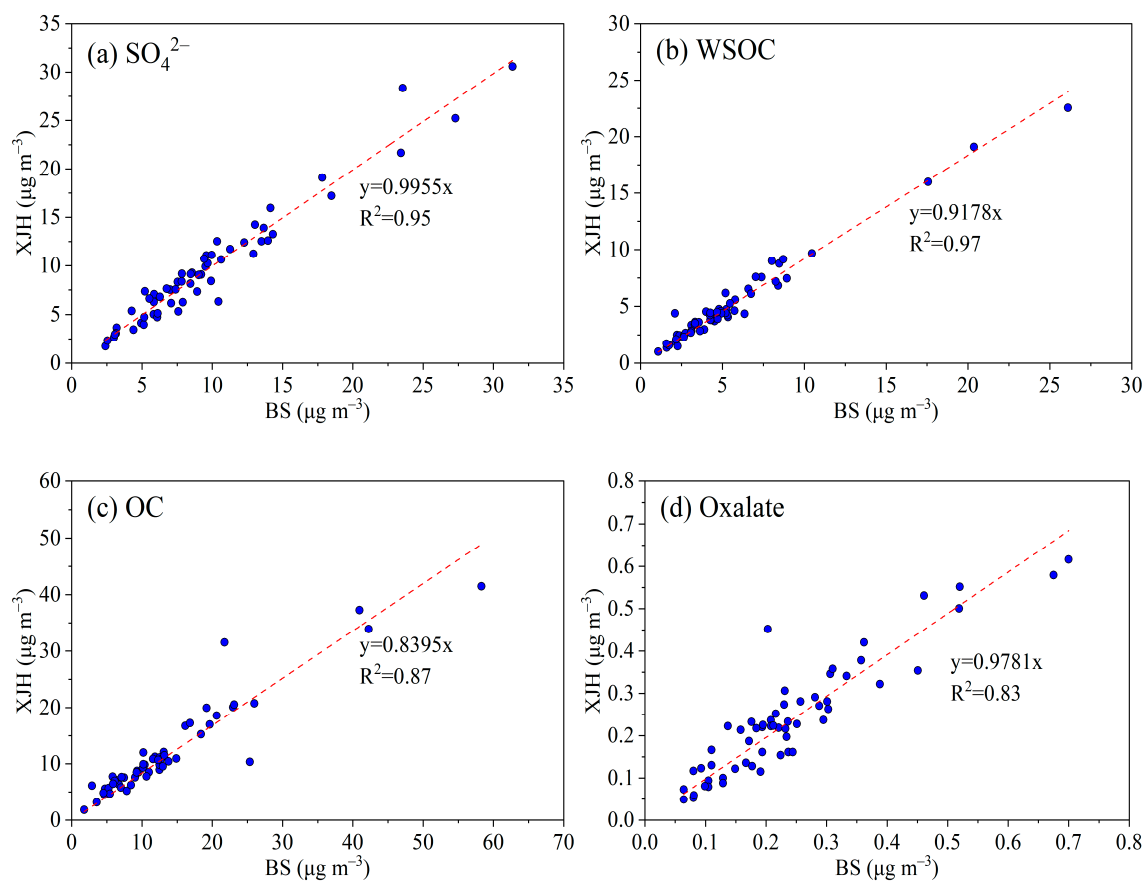

**Figure S13.** pollutants correlation in BS and XJH.

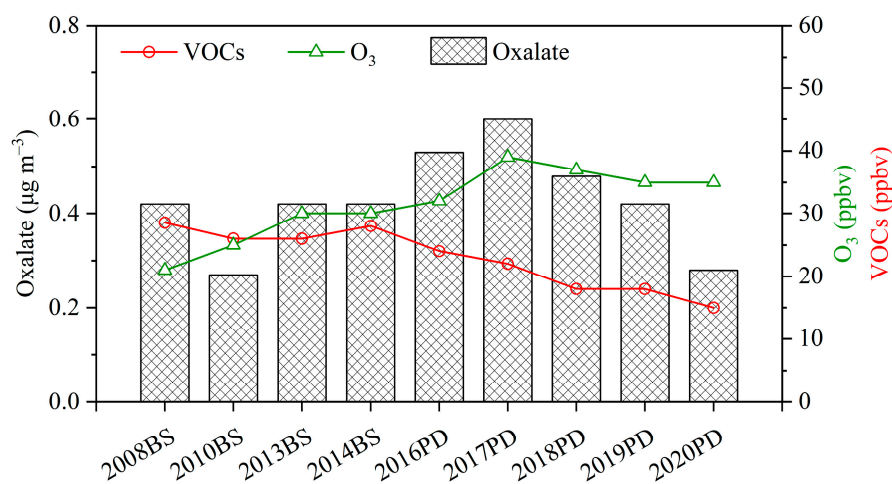

**Figure S14.** Interannual variation of the concentrations of oxalate, VOCs and O<sub>3</sub> in Shanghai (Data of VOCs of 2008-2014 was from Peng et al [1,2]; and VOCs of 2016-2020 and O<sub>3</sub> were from the Shanghai environmental monitoring center.).

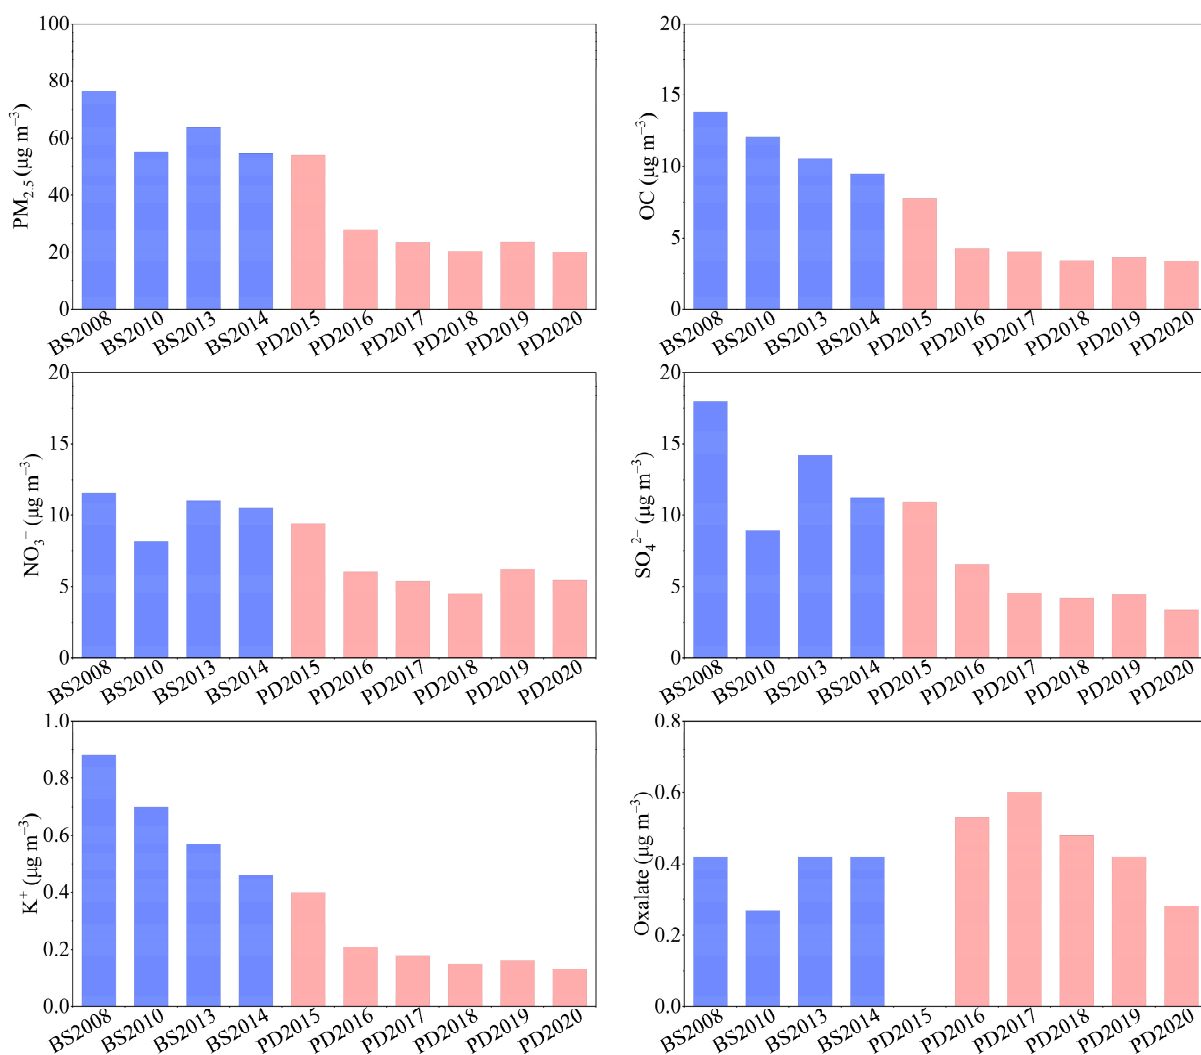

**Figure S15.** Evolution of particulate pollutants for Shanghai from 2008 to 2020. Blue bars represent BS and red bars represent PD.

**Table S1.** The ratio of Ca<sup>2+</sup>/K<sup>+</sup> in biomass burning aerosol reported in previous studies.

| Sampling | Biomass type | Year          | Region   | K <sup>+</sup> (mg kg <sup>-1</sup> ) | Ca <sup>2+</sup> (mg kg <sup>-1</sup> ) | Ca <sup>2+</sup> /K <sup>+</sup> | References |
|----------|--------------|---------------|----------|---------------------------------------|-----------------------------------------|----------------------------------|------------|
| Chamber  | Corn cob     | 2018.8-2019.2 | Liaoning | 174.66±46.01                          | 18.47±2.14                              | 0.11                             | [3]        |
| Chamber  | Corn cob     | 2018.8-2019.2 | Shanxi   | 254.70±41.23                          | 4.03±0.57                               | 0.02                             | [3]        |
| Chamber  | Corn cob     | 2018.8-2019.2 | Henan    | 208.17±53.47                          | 44.92±34.51                             | 0.22                             | [3]        |
| Chamber  | Corn cob     | 2018.8-2019.2 | Shandong | 540.73±95.65                          | 12.21±4.49                              | 0.02                             | [3]        |
| Chamber  | Corn cob     | 2018.8-2019.2 | Hubei    | 269.02±45.58                          | 22.31±11.15                             | 0.08                             | [3]        |
| Chamber  | Wheat straw  |               |          | 530±250                               | 82±72                                   | 0.15                             | [4]        |
| Chamber  | Rice straw   |               |          | 900±870                               | 77±30                                   | 0.09                             | [4]        |
| Chamber  | Corn straw   |               |          | 280±120                               | 88±43                                   | 0.31                             | [4]        |
| Chamber  | Wheat straw  |               |          | 350±180                               | 30±20                                   | 0.09                             | [5]        |
| Chamber  | Corn straw   |               |          | 390±210                               | 60±40                                   | 0.15                             | [5]        |
| Chamber  | Rice straw   |               |          | 390±280                               | 30±10                                   | 0.08                             | [5]        |
| Chamber  | Wheat straw  |               |          | 490.21±359.74                         | 19.35±75.43                             | 0.04                             | [6]        |
| Chamber  | Corn straw   |               |          | 134.80±84.31                          | 60.54±52.64                             | 0.45                             | [6]        |
| Chamber  | Rice straw   |               |          | 246.10±297.61                         | 65.79±60.95                             | 0.27                             | [6]        |

**Table S2.** Annual PM<sub>2.5</sub> concentrations at 9 monitoring stations in Shanghai during 2015-2021.

| Site | Huangpu | Hongkou | Xujiahui | Yangpu | Qingpu | Jing'an | Chuansha | PudongN | Zhangjiang | Baoshan | Average | CV   |
|------|---------|---------|----------|--------|--------|---------|----------|---------|------------|---------|---------|------|
| 2015 | 55      | 52      | 53       | 54     | 63     | 55      | 50       | 52      | 51         | 56      | 54      | 6.7% |
| 2016 | 48      | 45      | 44       | 46     | 53     | 49      | 40       | 44      | 47         | 46      | 46      | 7.1% |
| 2017 | 38      | 40      | 38       | 39     | 39     | 44      | 40       | 36      | 37         | 40      | 39      | 5.3% |
| 2018 | 36      | 35      | 37       | 37     | 42     | 35      | 34       | 34      | 36         | 34      | 36      | 6.4% |
| 2019 | 34      | 35      | 37       | 37     | 37     | 38      | 35       | 34      | 34         | 36      | 36      | 4.0% |
| 2020 | 33      | 32      | 33       | 32     | 36     | 32      | 30       | 30      | 32         | 33      | 32      | 5.1% |
| 2021 | /       | 28      | 29       | 27     | 29     | 29      | 26       | 28      | 29         | 28      | 28      | 3.1% |

## References

- Peng, Y.; Wang, H.; Wang, Q.; Jing, S.; An, J.; Gao, Y.; Huang, C.; Yan, R.; Dai, H.; Cheng, T. Observation-based sources evolution of non-methane hydrocarbons (NMHCs) in a megacity of China – Science Direct. *J. Environ. Sci. (China)*. **2022**, *124*, 794–805.
- Xu, J.; Tie, X.; Gao, W.; Lin, Y.; Fu, Q. Measurement and model analyses of the ozone variation during 2006 to 2015 and its response to emission change in megacity Shanghai, China. *Atmos. Chem. Phys.* **2019**, *19*, 9017–9035.
- Wu, J.; Kong, S.; Yan, Y.; Yao, L.; Yan, Q.; Liu, D.; Shen, G.; Zhang, X.; Qi, S. Neglected biomass burning emissions of air pollutants in China-views from the corn cob burning test, emission estimation, and simulations. *Atmos. Environ.* **2022**, *278*.
- Ni, H.; Tian, J.; Wang, X.; Wang, Q.; Han, Y.; Cao, J.; Long, X.; Chen, L.; Chow, J.C.; Watson, J.G. PM<sub>2.5</sub> emissions and source profiles from open burning of crop residues. *Atmos. Environ.* **2017**, *169*, 229–237.
- Zhang, H.; Hu, J.; Qi, Y.; Li, C.; Chen, J.; Wang, X.; He, J.; Wang, S.; Hao, J.; Zhang, L. Emission characterization, environmental impact, and control measure of PM<sub>2.5</sub> emitted from agricultural crop residue burning in China. *J. Cleaner Prod.* **2017**, *149*, 629–635.
- Tian, J. Study on Emission Characteristics of PM<sub>2.5</sub> from Crop Residue Burning and Residential Coal Combustion in China. Ph.D. Thesis, University of Chinese Academy of Sciences, Xi'an, China. October **2016**. Available online: (accessed date: 5 July 2020)
